# Supplementary material
Source: publisher site journal article supplement (http://www.spandidos-publications.com/3710/downloadSupplementary)

Figure S1. Top 30 pathways of Pathway Enrichment (EGCG + CSE vs. CSE). Top 30 pathways were obtained by KEGG enrichment analysis. Including the P53 signaling pathway, mRNA surveillance pathways, alpha-linolenic acid metabolism, TGF- $\beta$  signaling pathways, prostate cancer, phosphatidylinositol signal system, other types of *O*-glycan biosynthesis, non-small cell lung cancer, NOD-like receptor signaling pathways, metabolism of xenobiotics by cytochrome P450, melanogenesis, long-term depression, inositol phosphate metabolism, hepatitis c, Hedgehog signaling pathway, glycosaminoglycan biosynthesis-keratin sulfate, glycosaminoglycan biosynthesis-chondroitin sulfate/heparin, glycosaminoglycan biosynthesis-chondroitin sulfate/dermatan sulfate etc., glioma, gastric acid secretion, Fc gamma R-mediated phagocytosis, Fc $\epsilon$ Ri signaling pathway, ErbB signaling pathway, chronic myeloid leukemia, Chagas disease (American trypanosomiasis), ascorbate and aldarate metabolism, adipocytokine signaling pathway, adhesion junctions, acute myeloid leukemia.

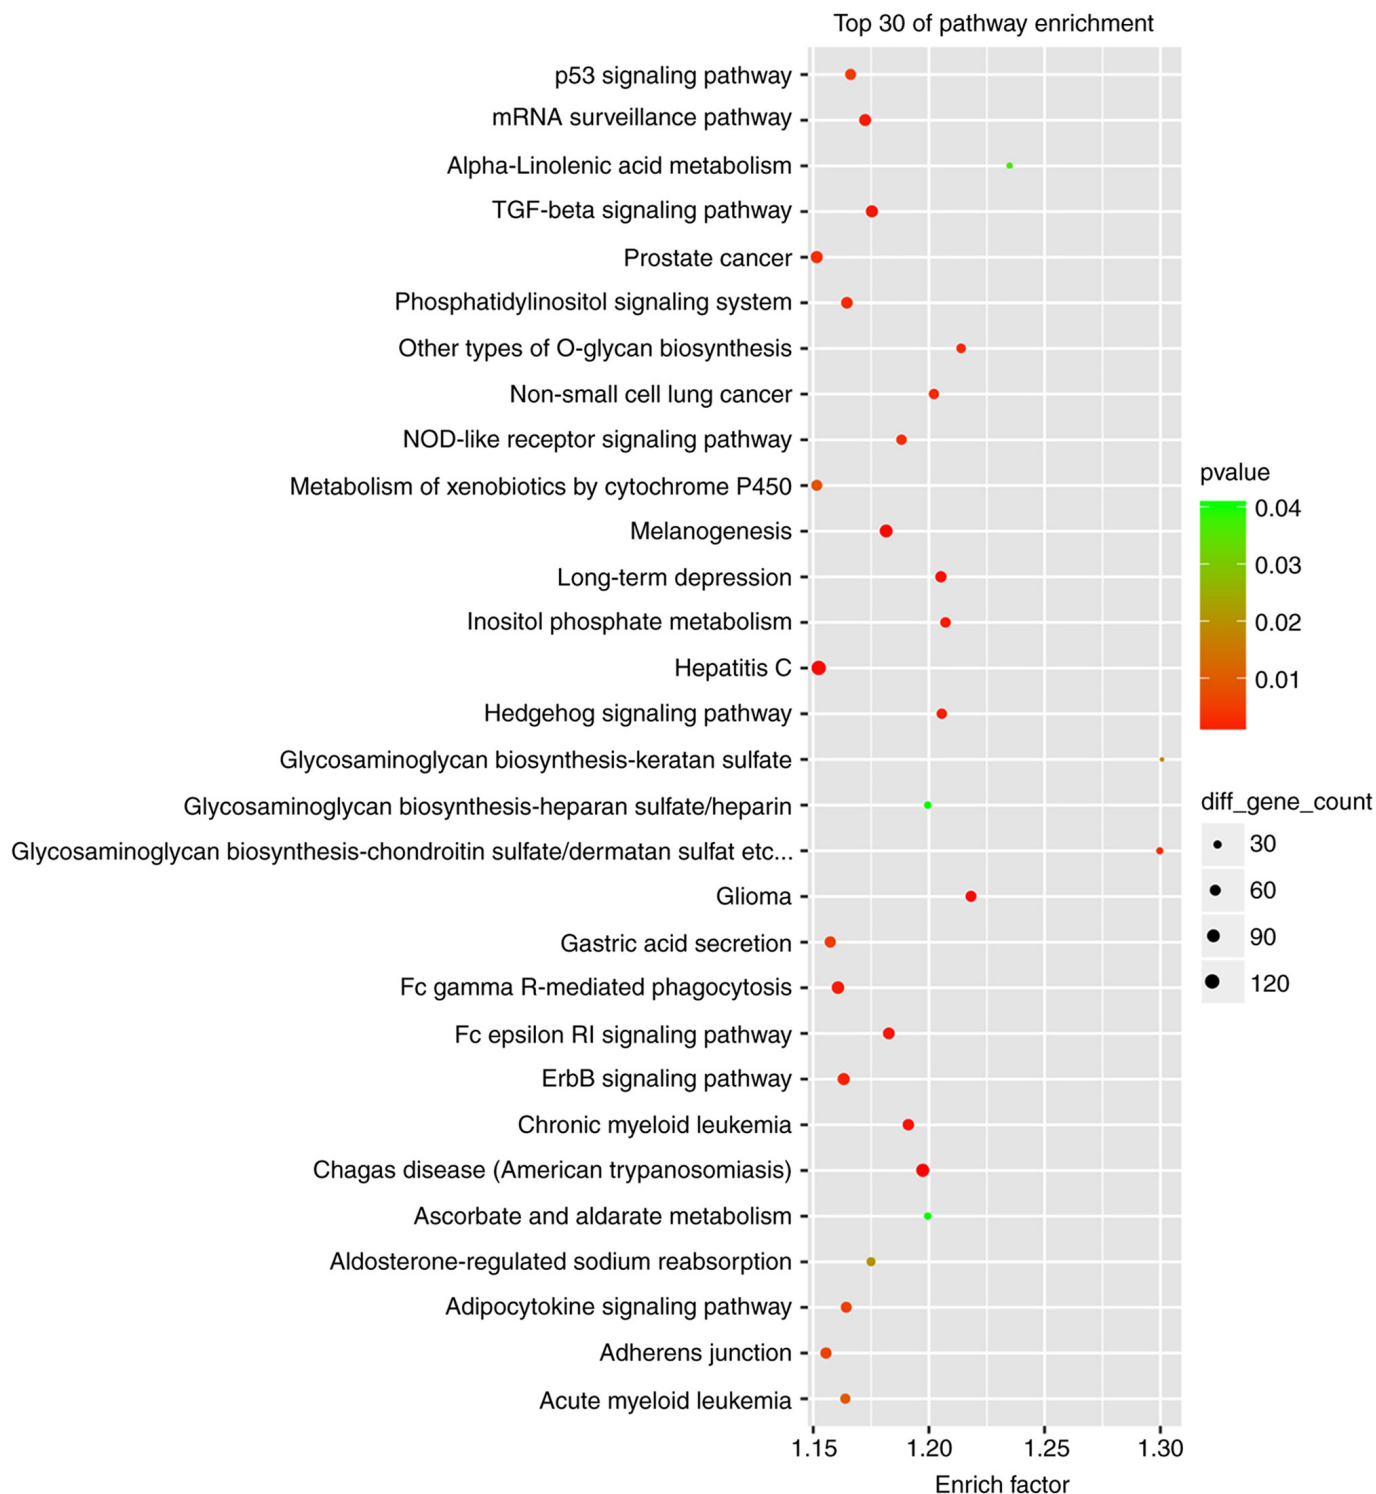

Supplement: Supplementary file 1 [file downloadSupplementary]
